# Supplementary material for: The Relationship between Suicidality and Socio-Demographic Variables, Physical Disorders, and Psychiatric Disorders: Results from the Singapore Mental Health Study 2016
Source: MDPI journal article supplement (doi:10.3390/ijerph18084365), 2021-04-20
Supplement: s1 [file s1]

**Supplementary Material 1**  
**Suicidality Module of WHO-CIDI V21.1.4**

**SUICIDALITY (SD)**

\*SD1. INTERVIEWER CHECKPOINT:

RESPONDENT IS ABLE TO READ..... 1  
ALL OTHERS.....2     **GO TO \*SD15**

---

\*SD2. (RB, PG 20) Three experiences are listed in your booklet on page 20 labeled A, B, and C. Did experience A ever happen to you ?

INTERVIEWER: EXPERIENCE A IS 'YOU SERIOUSLY THOUGHT ABOUT COMMITTING SUICIDE'

YES ..... 1  
NO.....5     **GO TO \*SR1, NEXT SECTION**  
DON'T KNOW.....8     **GO TO \*SR1, NEXT SECTION**  
REFUSED .....9     **GO TO \*SR1, NEXT SECTION**

\*SD2a. How old were you the first time this happened?

\_\_\_\_\_ YEARS OLD

DON'T KNOW ..... 998  
REFUSED ..... 999

---

\*SD3. Did Experience A happen to you at any time in the past 12 months?

YES.....1     **GO TO \*SD4**  
NO .....5  
DON'T KNOW .....8  
REFUSED .....9

\*SD3a. How old were you the last time this experience happened to you?

\_\_\_\_\_ YEARS OLD

DON'T KNOW ..... 998  
REFUSED ..... 999

---

\*SD4. (RB, PG 20) Now look at the second of the three experiences on the list, Experience B. Did experience B ever happen to you?

INTERVIEWER: EXPERIENCE B IS 'YOU MADE A PLAN FOR COMMITTING SUICIDE'

YES ..... 1  
NO.....5     **GO TO \*SD6**  
DON'T KNOW.....8     **GO TO \*SD6**  
REFUSED .....9     **GO TO \*SD6**

\*SD4a. How old were you the first time this happened?

\_\_\_\_\_ YEARS OLD

DON'T KNOW ..... 998



\*SD5. Did Experience B happen to you at any time in the past 12 months?

YES.....1      **GO TO \*SD6**  
NO .....5  
DON'T KNOW .....8  
REFUSED .....9

\*SD5a. How old were you the last time this experience happened to you?

\_\_\_\_\_ YEARS OLD

DON'T KNOW ..... 998  
REFUSED ..... 999

---

\*SD6. (RB, PG 20) Now look at the third of the three experiences on the list, Experience C. Did experience C ever happen to you ?

INTERVIEWER: EXPERIENCE C IS 'YOU ATTEMPTED SUICIDE'

YES .....1  
NO.....5      **GO TO \*SR1, NEXT SECTION**  
DON'T KNOW.....8      **GO TO \*SR1, NEXT SECTION**  
REFUSED .....9      **GO TO \*SR1, NEXT SECTION**

\*SD6a. How many times did Experience C ever happen to you in your lifetime?

\_\_\_\_\_ NUMBER OF TIMES

DON'T KNOW ..... 998  
REFUSED ..... 999

---

\*SD7. INTERVIEWER CHECKPOINT: (SEE \*SD6a)

\*SD6a EQUALS '1' ..... 1      **GO TO \*SD10**  
ALL OTHERS ..... 2

---

\*SD8. How old were you the first time?

\_\_\_\_\_ YEARS OLD

DON'T KNOW .....998  
REFUSED .....999

\*SD9. (RB, PG 21) There are three statements numbered 1, 2, and 3 on page 21 in your booklet. Which of these three statements best describes your situation when Experience C happened to you the first time -- 1, 2, or 3?

I MADE A SERIOUS ATTEMPT TO KILL MYSELF AND  
IT WAS ONLY LUCK THAT I DID NOT SUCCEED ..... 1

I TRIED TO KILL MYSELF, BUT KNEW THAT THE  
METHOD WAS NOT FOOL-PROOF..... 2

MY ATTEMPT WAS A CRY FOR HELP. I DID NOT INTEND TO DIE ..... 3

DON'T KNOW ..... 8

REFUSED ..... 9

---

\*SD10. Did Experience C happen to you in the past 12 months?

YES.....1      **GO TO \*SD11**

NO ..... 5

DON'T KNOW ..... 8

REFUSED ..... 9

\*SD10a. How old were you (when/the last time) experience C happened to you?

\_\_\_\_\_ YEARS OLD      **GO TO \*SD14**

DON'T KNOW .....998      **GO TO \*SD14**

REFUSED .....999      **GO TO \*SD14**

---

\*SD11. Did it result in an injury or poisoning?

YES.....1

NO.....5      **GO TO \*SD14**

DON'T KNOW .....8      **GO TO \*SD14**

REFUSED .....9      **GO TO \*SD14**

---

\*SD12. Did it require medical attention?

YES.....1

NO.....5      **GO TO \*SD14**

DON'T KNOW .....8      **GO TO \*SD14**

REFUSED .....9      **GO TO \*SD14**

---

\*SD13. Did it require overnight hospitalization?

YES.....1

NO ..... 5

DON'T KNOW ..... 8

REFUSED ..... 9

**\*SD14.** (RB, PG 21) Looking at page 21 in your booklet, which of the three statements best describes your situation when Experience C happened to you (the last time) – 1, 2, or 3?

- I MADE A SERIOUS ATTEMPT TO KILL MYSELF AND  
IT WAS ONLY LUCK THAT I DID NOT SUCCEED ..... 1
- I TRIED TO KILL MYSELF, BUT KNEW THAT THE  
METHOD WAS NOT FOOL-PROOF..... 2
- MY ATTEMPT WAS A CRY FOR HELP. I DID NOT INTEND TO DIE ..... 3
- DON'T KNOW ..... 8
- REFUSED..... 9

---

**\*SD14.1.** INTERVIEWER CHECKPOINT: (SEE **\*SD10**)

- \*SD10** EQUALS '1' ..... 1
- ALL OTHERS..... 2      **GO TO \*SR1, NEXT SECTION**

---

**\*SD14.2.** (RB, PG 22) Please look at page 22 in your booklet. Which method did you use (when/the last time) Experience C happened to you? (Just give me the letter.)

- A. GUN ..... 1
- B. RAZOR, KNIFE OR OTHER SHARP INSTRUMENT..... 2
- C. OVERDOSE OF PRESCRIPTION MEDICATIONS.....3
- D. OVERDOSE OF OVER-THE-COUNTER MEDICATIONS..... 4
- E. OVERDOSE OF OTHER DRUG (E.G. HEROIN, CRACK, ALCOHOL)..... 5
- F. POISONING (E.G. CARBON MONOXIDE, RAT POISON) .....6
- G. HANGING, STRANGULATION, SUFFOCATION..... 7
- H. DROWNING .....8
- I. JUMPING FROM HIGH PLACES..... 9
- J. MOTOR VEHICLE CRASH..... 10
- K. OTHER (PLEASE DESCRIBE) ..... 11

- 
- DON'T KNOW ..... 98
- REFUSED ..... 99

**GO TO \*SR1, NEXT SECTION**

---

**\*SD15.** The next few questions are about thoughts of hurting yourself. Have you ever seriously thought about committing suicide?

- YES ..... 1
- NO.....5      **GO TO \*SR1, NEXT SECTION**
- DON'T KNOW.....8      **GO TO \*SR1, NEXT SECTION**
- REFUSED .....9      **GO TO \*SR1, NEXT SECTION**

**\*SD15a.** How old were you the first time this happened?

\_\_\_\_\_ YEARS OLD

- DON'T KNOW ..... 998
- REFUSED ..... 999

\*SD16. Have you seriously thought about committing suicide at any time in the past 12 months?

YES.....1     **GO TO \*SD17**  
NO .....5  
DON'T KNOW .....8  
REFUSED .....9

\*SD16a. How old were you the last time this experience happened to you?

\_\_\_\_\_ YEARS OLD

DON'T KNOW .....998  
REFUSED .....999

---

\*SD17. Have you ever made a plan for committing suicide?

YES.....1  
NO.....5     **GO TO \*SD19**  
DON'T KNOW.....8     **GO TO \*SD19**  
REFUSED .....9     **GO TO \*SD19**

\*SD17a. How old were you the first time this happened?

\_\_\_\_\_ YEARS OLD

DON'T KNOW .....998  
REFUSED .....999

---

\*SD18. Did you make a plan for committing suicide at any time in the past 12 months?

YES.....1     **GO TO \*SD19**  
NO .....5  
DON'T KNOW .....8  
REFUSED .....9

\*SD18a. How old were you the last time this experience happened to you?

\_\_\_\_\_ YEARS OLD

DON'T KNOW .....998  
REFUSED .....999

---

\*SD19. Have you ever attempted suicide?

YES.....1  
NO.....5     **GO TO \*SR1, NEXT SECTION**  
DON'T KNOW.....8     **GO TO \*SR1, NEXT SECTION**  
REFUSED .....9     **GO TO \*SR1, NEXT SECTION**

\*SD19a. How many times have you attempted suicide in your lifetime?

\_\_\_\_\_ NUMBER OF TIMES

DON'T KNOW ..... 998  
REFUSED ..... 999

\*SD20. INTERVIEWER CHECKPOINT (SEE \*SD19a):

\*SD19a EQUALS '1' ..... 1    **GO TO \*SD23**  
ALL OTHERS ..... 2

---

\*SD21. How old were you the first time?

\_\_\_\_\_ YEARS OLD

DON'T KNOW .....998  
REFUSED .....999

---

\*SD22. There are three statements I will read out loud. Please tell me which of these three statements best describes your situation when you attempted suicide the first time – one, two, or three?

“One, I made a serious attempt to kill myself and it was only luck that I did not succeed.”  
“Two, I tried to kill myself, but knew that the method was not fool-proof.”  
“Three, my attempt was a cry for help, I did not intend to die.”

I MADE A SERIOUS ATTEMPT TO KILL MYSELF AND  
IT WAS ONLY LUCK THAT I DID NOT SUCCEED ..... 1  
I TRIED TO KILL MYSELF, BUT KNEW THAT THE  
METHOD WAS NOT FOOL-PROOF ..... 2  
MY ATTEMPT WAS A CRY FOR HELP. I DID NOT INTEND TO DIE ..... 3  
DON'T KNOW ..... 8  
REFUSED ..... 9

---

\*SD23. Have you attempted suicide in the past 12 months?

YES ..... 1    **GO TO \*SD24**  
NO ..... 5  
DON'T KNOW ..... 8  
REFUSED ..... 9

\*SD23a. How old were you (when/the last time) you attempted suicide?

\_\_\_\_\_ YEARS OLD    **GO TO \*SD27**

DON'T KNOW .....998    **GO TO \*SD27**  
REFUSED .....999    **GO TO \*SD27**

---

\*SD24. Did it result in an injury or poisoning?

YES ..... 1  
NO ..... 5    **GO TO \*SD27**  
DON'T KNOW ..... 8    **GO TO \*SD27**  
REFUSED ..... 9    **GO TO \*SD27**

\*SD25. Did it require medical attention?

YES..... 1  
NO..... 5     **GO TO \*SD27**  
DON'T KNOW ..... 8     **GO TO \*SD27**  
REFUSED ..... 9     **GO TO \*SD27**

---

\*SD26. Did it require overnight hospitalization?

YES..... 1  
NO ..... 5  
DON'T KNOW ..... 8  
REFUSED ..... 9

---

\*SD27. There are three statements I will read out loud. Please tell me which of these three statements best describes your situation when you attempted suicide (the last time) – one, two, or three?

“One, I made a serious attempt to kill myself and it was only luck that I did not succeed.”  
“Two, I tried to kill myself, but knew that the method was not fool-proof.”  
“Three, my attempt was a cry for help, I did not intend to die.”

I MADE A SERIOUS ATTEMPT TO KILL MYSELF AND  
IT WAS ONLY LUCK THAT I DID NOT SUCCEED ..... 1  
I TRIED TO KILL MYSELF, BUT KNEW THAT THE  
METHOD WAS NOT FOOL-PROOF ..... 2  
MY ATTEMPT WAS A CRY FOR HELP. I DID NOT INTEND TO DIE ..... 3  
DON'T KNOW ..... 8  
REFUSED ..... 9

---

\*SD28. INTERVIEWER CHECKPOINT: (SEE \*SD23)

\*SD23 EQUALS '1' ..... 1  
ALL OTHERS..... 2     **GO TO \*SR1, NEXT SECTION**

---

\*SD29. Which method did you use (when/the last time) you attempted to commit suicide?

A. GUN ..... 1  
B. RAZOR, KNIFE OR OTHER SHARP INSTRUMENT ..... 2  
C. OVERDOSE OF PRESCRIPTION MEDICATIONS ..... 3  
D. OVERDOSE OF OVER-THE-COUNTER MEDICATIONS ..... 4  
E. OVERDOSE OF OTHER DRUG (E.G. HEROIN, CRACK, ALCOHOL) ..... 5  
F. POISONING (E.G. CARBON MONOXIDE, RAT POISON) ..... 6  
G. HANGING, STRANGULATION, SUFFOCATION ..... 7  
H. DROWNING ..... 8  
I. JUMPING FROM HIGH PLACES ..... 9  
J. MOTOR VEHICLE CRASH ..... 10  
K. OTHER (PLEASE DESCRIBE) ..... 11

DON'T KNOW ..... 98  
REFUSED ..... 99

**GO TO \*SR1, NEXT SECTION**
